# Supplementary material for: Enhanced photocatalytic activity of Bi25FeO40–Bi2WO6 heterostructures based on the rational design of the heterojunction interface
Source: Royal Society of Chemistry journal article supplement (doi:10.1039/c6ra00334f), 2016-01-01
Supplement: c6ra00334f1.pdf [file c6ra00334f1.pdf]

## Electronic supplementary information

Enhanced photocatalytic activity of  $\text{Bi}_{25}\text{FeO}_{40}\text{-Bi}_2\text{WO}_6$  heterostructures based on the rational design of heterojunction interface

Lei Zhang<sup>a, b</sup>, Yue Zou<sup>a</sup>, Jian Song<sup>a</sup>, Cheng-Ling Pan<sup>\*a</sup>, Shao-Ding Sheng<sup>\*a</sup> and Chang-Min Hou<sup>c</sup>

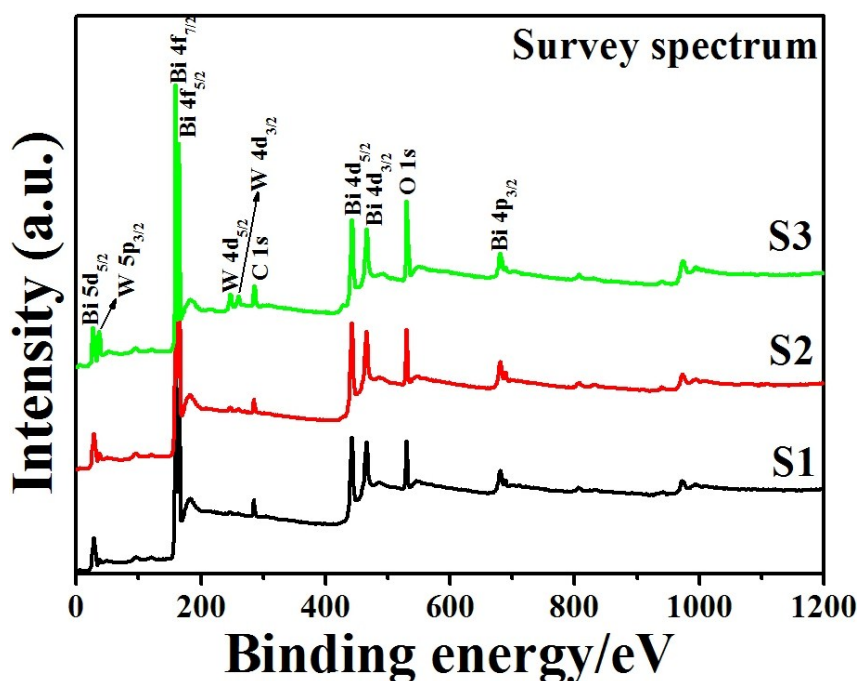

Fig. S1 Survey spectra of various samples (S1, S2 and S3) prepared at 180 °C for 24 h.

<sup>a</sup> Laboratory of Multiscale Materials and Molecular Catalysis, School of Materials Science and Engineering, Anhui University of Science and Technology, Huainan, Anhui 232001, P. R. China

E-mail: [clpan@aust.edu.cn](mailto:clpan@aust.edu.cn); [shengshao-4210@126.com](mailto:shengshao-4210@126.com)

<sup>b</sup> State Key Laboratory of Coordination Chemistry, School of Chemistry and Chemical Engineering, Nanjing University, Nanjing 210093, P. R. China

<sup>c</sup> State Key Lab of Inorganic Synthesis & Preparative Chemistry, College of Chemistry, Jilin University, Changchun 130012, P. R. China

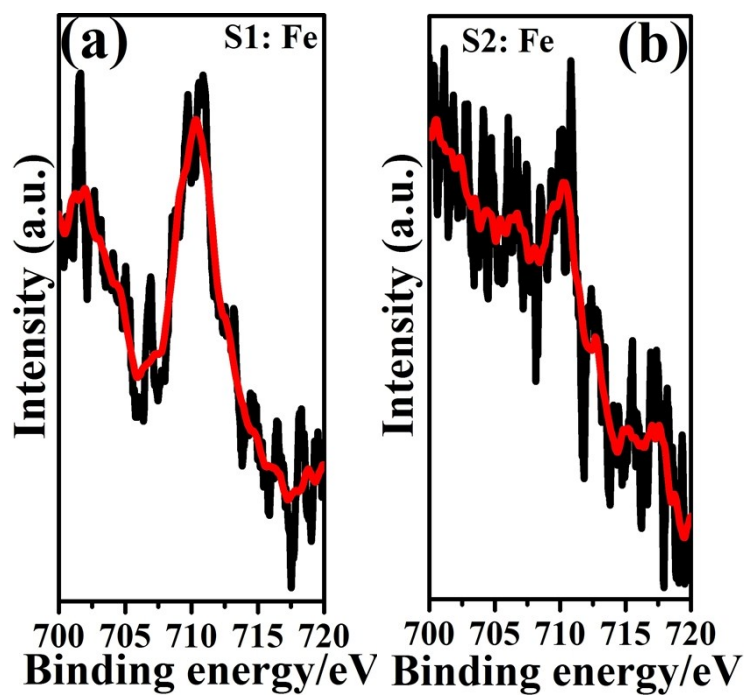

Fig. S2 High resolution Fe 2p spectra of S1 (a) and S2 (b) prepared at 180 °C for 24 h.

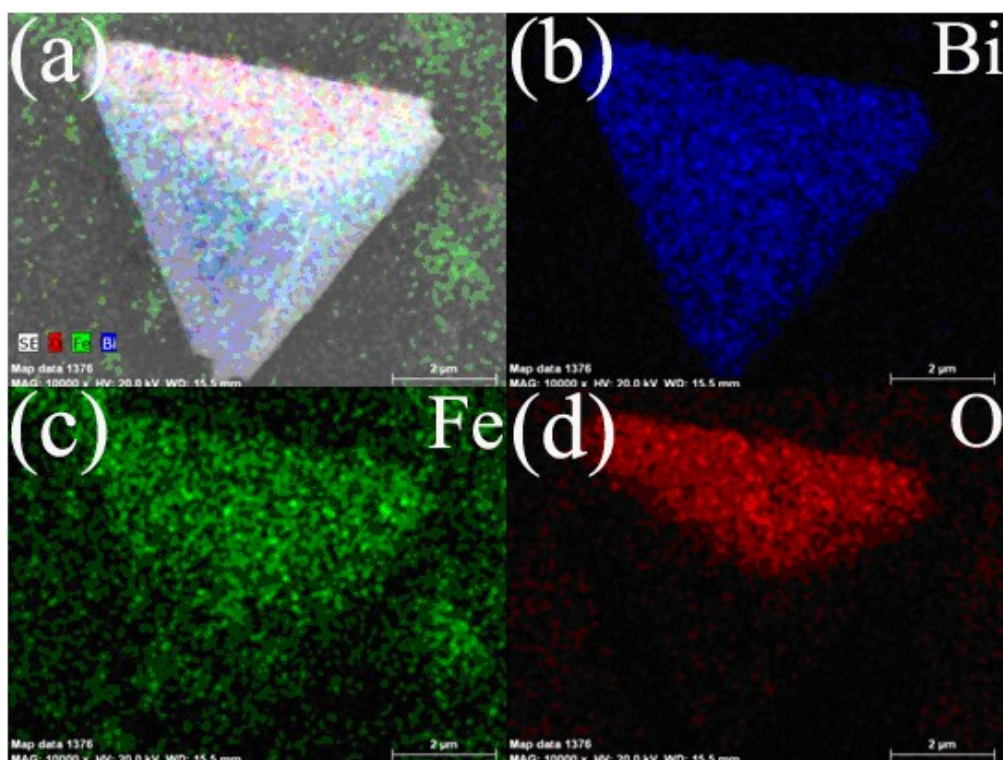

Fig. S3 EDS elemental mapping of S1 prepared at 180 °C for 24 h.

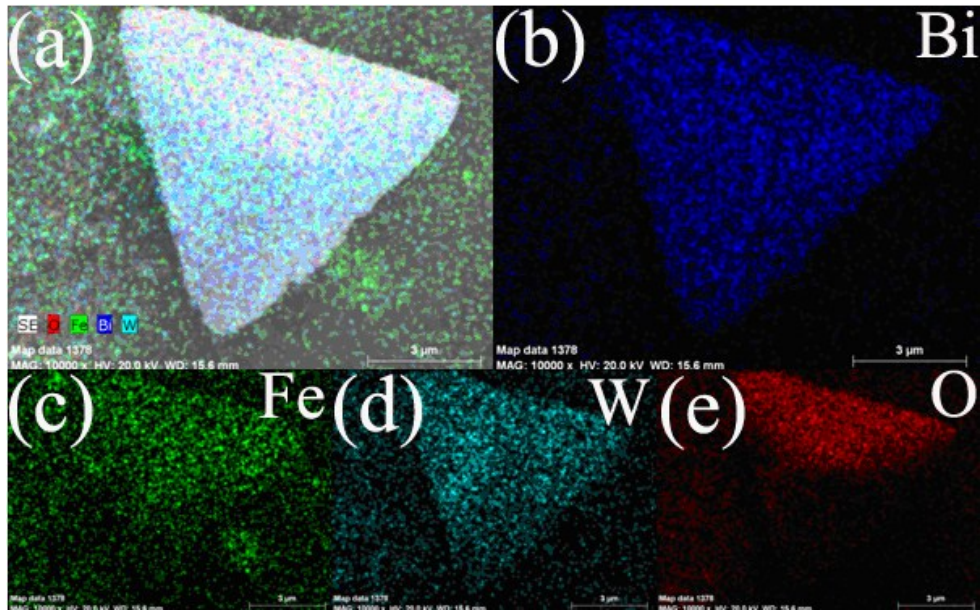

**Fig. S4** EDS elemental mapping of S2 prepared at 180 °C for 24 h.

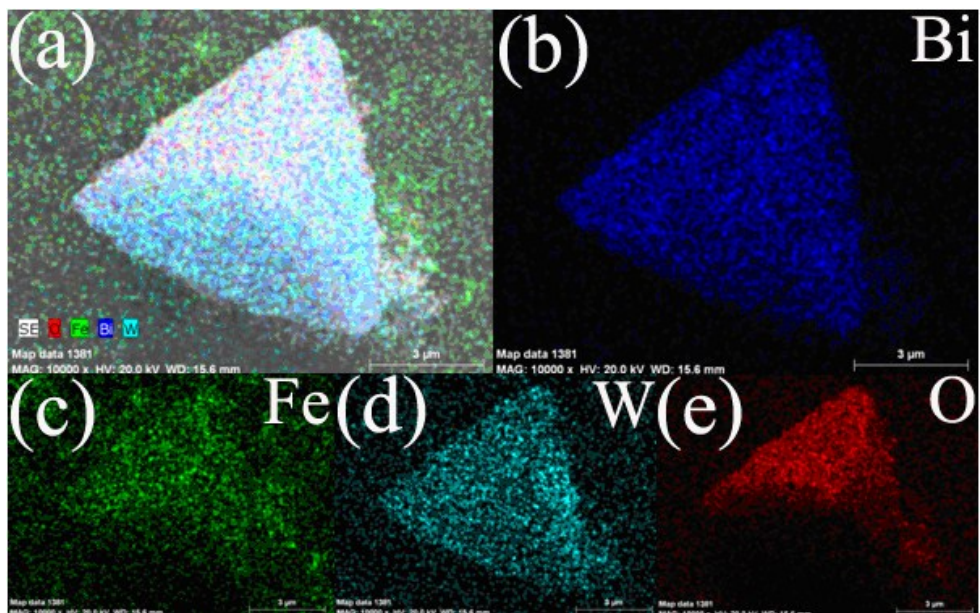

**Fig. S5** EDS elemental mapping of S3 prepared at 180 °C for 24 h.
